# Supplementary material for: Hypoxia-mediated Krebs von den Lungen-6 expression in breast cancer: Implications for tumor invasion and metastasis
Source: Oncol Rep. 2025 Dec 19;55(2):35. doi: 10.3892/or.2025.9040 (PMC12750046; doi:10.3892/or.2025.9040)
Supplement: Supporting Data [file Supplementary_Data.xlsx]

## Sheet: Sheet1
Table SI. Background characteristics of patients with breast cancer.
＃	Age	ER	PgR	HER-2	Metastasis /	KL-6			HIF-1α			TNM	Stage	Ope	Endocrine Therapy		Chemotherapy		RT
					reoccurence	Intensity	Proportion	Total Score	Intensity	Proportion	Total Score				NET	AET	NAC	ACT
1	73	-	-	-	-	3	5	8	1	1	2	T2N0M0	IIA	TM	-	-	-	-	-
2	84	-	-	-	-	3	3	6	1	1	2	T1N0M0	I	PM	-	-	-	-	+
3	56	-	-	-	-	2	3	5	1	0	1	T2N2aM0	IIIA	TM	-	-	+	-	+
4	51	-	-	-	-	2	3	5	1	0	1	T1N1M0	IIA	PM	-	-	+	-	+
5	63	-	-	-	-	2	2	4	1	0	1	T2N1M0	IIB	PM	-	-	+	-	-
6	71	-	-	-	+	0	0	0	0	0	0	T2N1M0	IIB	PM	-	-	+	-	+
7	53	-	-	-	-	2	5	7	0	0	0	T1N1M0	IIA	TM	-	-	-	+	-
8	81	-	-	-	-	3	2	5	0	0	0	T2N0M0	IIA	TM	-	-	-	-	-
9	57	+	+	-	+	3	3	6	0	0	0	T1N0M0	I	PM	-	+	-	-	+
10	71	+	+	-	-	3	5	8	0	0	0	T1N0M0	I	PM	-	+	-	-	+
11	57	+	+	-	-	2	2	4	0	0	0	T1N1M0	IIA	PM	-	+	-	+	-
12	63	+	+	-	+	3	5	8	3	3	6	T2N1M0	IIB	TM	-	+	-	+	+
13	42	+	+	-	+	3	4	7	1	2	3	T2N0M0	IIA	PM	-	+	+	-	+
14	65	+	-	-	+	3	5	8	3	3	6	T2N1M0	IIB	TM	-	+	+	+	+
15	69	+	+	-	-	3	3	6	2	1	3	T1N0M0	I	TM	-	+	-	+	-
16	65	+	+	+	-	2	3	5	0	0	0	T1N0M0	I	PM	-	+	-	+	+
17	61	+	+	-	-	2	3	5	0	0	0	T2N0M0	IIA	PM	-	+	-	+	+
18	64	+	+	-	-	2	2	4	1	1	2	T1N0M0	I	PM	-	+	-	+	+
19	40	+	+	+	-	3	2	5	0	0	0	T1N0M0	I	TM	-	+	-	-	-
20	74	+	+	-	+	3	4	7	1	1	2	T1N0M0	I	TM	-	+	-	-	+
21	51	-	-	+	+	3	2	5	0	0	0	T2N0M0	IIA	PM	-	-	-	-	+
22	48	-	-	-	+	3	3	6	3	2	5	T2N1M0	IIB	PM	-	-	+	-	+
23	68	-	-	-	-	2	2	4	1	1	2	T2N0M0	IIA	TM	-	-	-	+	-
24	80	+	-	-	+	3	4	7	3	2	5	T2N1M0	IIB	TM	-	-	-	-	-
25	60	+	+	-	-	3	5	8	1	1	2	T2N0M0	IIA	TM	-	+	-	+	-
26	73	-	-	-	-	3	4	7	1	1	2	T2N1M0	IIB	TM	+	+	+	-	-
27	69	-	-	-	-	3	2	5	1	1	2	T1N0M0	I	TM	-	-	-	-	-
28	91	-	-	-	-	3	1	4	1	3	4	T2N0M0	IIA	TM	-	-	-	-	-
29	62	-	-	-	-	3	2	5	1	1	2	T2N1M0	IIB	PM	-	-	+	-	+
30	45	+	-	-	-	3	4	7	0	0	0	T2N0M0	IIA	PM	-	-	+	+	+
ER, estrogen receptor; PR, progesterone receptor; HER-2, human epidermal growth factor receptor type-2; KL-6, Krebs von den lungen-6; HIF-1α, hypoxia-inducible factor 1α; Ope, operation; TM, total mastectomy; PM, partial mastectomy; RT, radiation therapy; NET, neoadjuvant endocrine therapy; AET, adjuvant endocrine therapy; NAC, neoadjuvant chemotherapy; ACT, adjuvant chemotherapy
